# Supplementary material for: Trace Mineral Solubility and Digestibility in the Small Intestine of Piglets Are Affected by Zinc and Fibre Sources
Source: MDPI journal article supplement (doi:10.3390/agriculture12040517), 2022-04-06
Supplement: s1 [file s1]

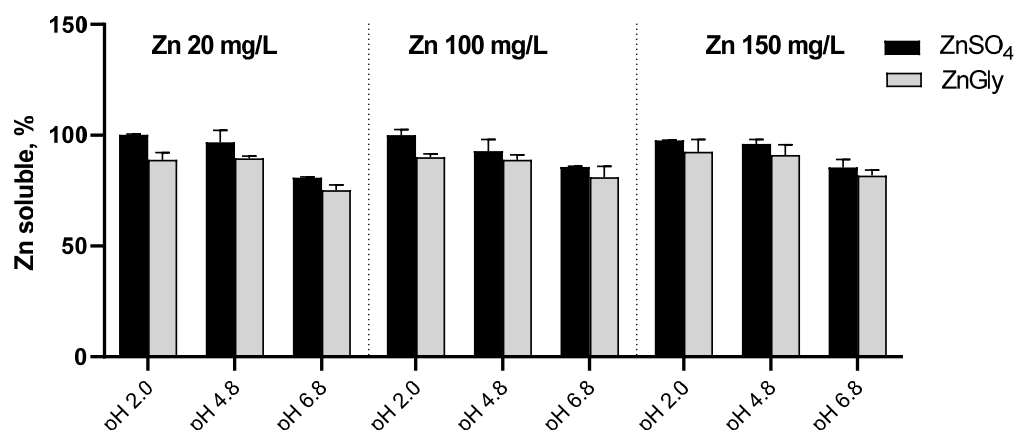

**Figure S1.** *In vitro* solubility of Zn from both Zn sources (ZnSO<sub>4</sub>, ZnGly), subjected to different buffers simulating gastric digestion in 0.2M Gly-HCl at pH 2.0, or simulating small intestinal digestion in 0.2M sodium acetate buffer at pH 4.8 and 6.8.

Data were analyzed using two-way ANOVA, followed by the post hoc Tukey's multiple comparisons test. Significant differences between Zn source, dose and pH are presented in the Table S1.

**Table S1.** Individual significant differences between parameters *in vitro* solubility of Zn from both Zn sources (ZnSO<sub>4</sub>, ZnGly), subjected to different buffers simulating gastric digestion in 0.2M Gly-HCl at pH 2.0, or simulating small intestinal digestion in 0.2M sodium acetate buffer at pH 4.8 and 6.8.

| Tukey's multiple comparisons test                             | Predicted (LS) mean diff. | 95.00% CI of diff. | Summary | Adjusted P Value |
|---------------------------------------------------------------|---------------------------|--------------------|---------|------------------|
| pH 2.0:ZnSO <sub>4</sub> 20 vs. pH 2.0:ZnSO <sub>4</sub> 100  | -0.2667                   | -9.521 to 8.988    | ns      | >0.9999          |
| pH 2.0:ZnSO <sub>4</sub> 20 vs. pH 2.0:ZnSO <sub>4</sub> 150  | -0.4667                   | -9.721 to 8.788    | ns      | >0.9999          |
| pH 2.0:ZnSO <sub>4</sub> 20 vs. pH 2.0:ZnGly 20               | 8.033                     | -1.221 to 17.29    | ns      | 0.1461           |
| pH 2.0:ZnSO <sub>4</sub> 20 vs. pH 2.0:ZnGly 100              | 5.900                     | -3.354 to 15.15    | ns      | 0.5871           |
| pH 2.0:ZnSO <sub>4</sub> 20 vs. pH 2.0:ZnGly 150              | 4.133                     | -5.121 to 13.39    | ns      | 0.9488           |
| pH 2.0:ZnSO <sub>4</sub> 20 vs. pH 4.8:ZnSO <sub>4</sub> 20   | 2.358                     | -4.186 to 8.902    | ns      | 0.9927           |
| pH 2.0:ZnSO <sub>4</sub> 20 vs. pH 4.8:ZnSO <sub>4</sub> 100  | 2.092                     | -9.243 to 13.43    | ns      | >0.9999          |
| pH 2.0:ZnSO <sub>4</sub> 20 vs. pH 4.8:ZnSO <sub>4</sub> 150  | 1.892                     | -9.443 to 13.23    | ns      | >0.9999          |
| pH 2.0:ZnSO <sub>4</sub> 20 vs. pH 4.8:ZnGly 20               | 10.39                     | -0.9426 to 21.73   | ns      | 0.1000           |
| pH 2.0:ZnSO <sub>4</sub> 20 vs. pH 4.8:ZnGly 100              | 8.258                     | -3.076 to 19.59    | ns      | 0.3719           |
| pH 2.0:ZnSO <sub>4</sub> 20 vs. pH 4.8:ZnGly 150              | 6.492                     | -4.843 to 17.83    | ns      | 0.7433           |
| pH 2.0:ZnSO <sub>4</sub> 20 vs. pH 6.8:ZnSO <sub>4</sub> 20   | 13.23                     | 6.689 to 19.78     | ****    | <0.0001          |
| pH 2.0:ZnSO <sub>4</sub> 20 vs. pH 6.8:ZnSO <sub>4</sub> 100  | 12.97                     | 1.632 to 24.30     | *       | 0.0136           |
| pH 2.0:ZnSO <sub>4</sub> 20 vs. pH 6.8:ZnSO <sub>4</sub> 150  | 12.77                     | 1.432 to 24.10     | *       | 0.0160           |
| pH 2.0:ZnSO <sub>4</sub> 20 vs. pH 6.8:ZnGly 20               | 21.27                     | 9.932 to 32.60     | ****    | <0.0001          |
| pH 2.0:ZnSO <sub>4</sub> 20 vs. pH 6.8:ZnGly 100              | 19.13                     | 7.799 to 30.47     | ****    | <0.0001          |
| pH 2.0:ZnSO <sub>4</sub> 20 vs. pH 6.8:ZnGly 150              | 17.37                     | 6.032 to 28.70     | ***     | 0.0003           |
| pH 2.0:ZnSO <sub>4</sub> 100 vs. pH 2.0:ZnSO <sub>4</sub> 150 | -0.2000                   | -9.454 to 9.054    | ns      | >0.9999          |
| pH 2.0:ZnSO <sub>4</sub> 100 vs. pH 2.0:ZnGly 20              | 8.300                     | -0.9544 to 17.55   | ns      | 0.1171           |
| pH 2.0:ZnSO <sub>4</sub> 100 vs. pH 2.0:ZnGly 100             | 6.167                     | -3.088 to 15.42    | ns      | 0.5159           |
| pH 2.0:ZnSO <sub>4</sub> 100 vs. pH 2.0:ZnGly 150             | 4.400                     | -4.854 to 13.65    | ns      | 0.9178           |

|                                       |        |                  |      |         |
|---------------------------------------|--------|------------------|------|---------|
| pH 2.0:ZnSO4 100 vs. pH 4.8:ZnSO4 20  | 2.625  | -8.709 to 13.96  | ns   | >0.9999 |
| pH 2.0:ZnSO4 100 vs. pH 4.8:ZnSO4 100 | 2.358  | -4.186 to 8.902  | ns   | 0.9927  |
| pH 2.0:ZnSO4 100 vs. pH 4.8:ZnSO4 150 | 2.158  | -9.176 to 13.49  | ns   | >0.9999 |
| pH 2.0:ZnSO4 100 vs. pH 4.8:ZnGly 20  | 10.66  | -0.6759 to 21.99 | ns   | 0.0827  |
| pH 2.0:ZnSO4 100 vs. pH 4.8:ZnGly 100 | 8.525  | -2.809 to 19.86  | ns   | 0.3235  |
| pH 2.0:ZnSO4 100 vs. pH 4.8:ZnGly 150 | 6.758  | -4.576 to 18.09  | ns   | 0.6884  |
| pH 2.0:ZnSO4 100 vs. pH 6.8:ZnSO4 20  | 13.50  | 2.166 to 24.83   | **   | 0.0087  |
| pH 2.0:ZnSO4 100 vs. pH 6.8:ZnSO4 100 | 13.23  | 6.689 to 19.78   | **** | <0.0001 |
| pH 2.0:ZnSO4 100 vs. pH 6.8:ZnSO4 150 | 13.03  | 1.699 to 24.37   | *    | 0.0129  |
| pH 2.0:ZnSO4 100 vs. pH 6.8:ZnGly 20  | 21.53  | 10.20 to 32.87   | **** | <0.0001 |
| pH 2.0:ZnSO4 100 vs. pH 6.8:ZnGly 100 | 19.40  | 8.066 to 30.73   | **** | <0.0001 |
| pH 2.0:ZnSO4 100 vs. pH 6.8:ZnGly 150 | 17.63  | 6.299 to 28.97   | ***  | 0.0002  |
| pH 2.0:ZnSO4 150 vs. pH 2.0:ZnGly 20  | 8.500  | -0.7544 to 17.75 | ns   | 0.0987  |
| pH 2.0:ZnSO4 150 vs. pH 2.0:ZnGly 100 | 6.367  | -2.888 to 15.62  | ns   | 0.4638  |
| pH 2.0:ZnSO4 150 vs. pH 2.0:ZnGly 150 | 4.600  | -4.654 to 13.85  | ns   | 0.8881  |
| pH 2.0:ZnSO4 150 vs. pH 4.8:ZnSO4 20  | 2.825  | -8.509 to 14.16  | ns   | >0.9999 |
| pH 2.0:ZnSO4 150 vs. pH 4.8:ZnSO4 100 | 2.558  | -8.776 to 13.89  | ns   | >0.9999 |
| pH 2.0:ZnSO4 150 vs. pH 4.8:ZnSO4 150 | 2.358  | -4.186 to 8.902  | ns   | 0.9927  |
| pH 2.0:ZnSO4 150 vs. pH 4.8:ZnGly 20  | 10.86  | -0.4759 to 22.19 | ns   | 0.0714  |
| pH 2.0:ZnSO4 150 vs. pH 4.8:ZnGly 100 | 8.725  | -2.609 to 20.06  | ns   | 0.2898  |
| pH 2.0:ZnSO4 150 vs. pH 4.8:ZnGly 150 | 6.958  | -4.376 to 18.29  | ns   | 0.6456  |
| pH 2.0:ZnSO4 150 vs. pH 6.8:ZnSO4 20  | 13.70  | 2.366 to 25.03   | **   | 0.0074  |
| pH 2.0:ZnSO4 150 vs. pH 6.8:ZnSO4 100 | 13.43  | 2.099 to 24.77   | **   | 0.0092  |
| pH 2.0:ZnSO4 150 vs. pH 6.8:ZnSO4 150 | 13.23  | 6.689 to 19.78   | **** | <0.0001 |
| pH 2.0:ZnSO4 150 vs. pH 6.8:ZnGly 20  | 21.73  | 10.40 to 33.07   | **** | <0.0001 |
| pH 2.0:ZnSO4 150 vs. pH 6.8:ZnGly 100 | 19.60  | 8.266 to 30.93   | **** | <0.0001 |
| pH 2.0:ZnSO4 150 vs. pH 6.8:ZnGly 150 | 17.83  | 6.499 to 29.17   | ***  | 0.0002  |
| pH 2.0:ZnGly 20 vs. pH 2.0:ZnGly 100  | -2.133 | -11.39 to 7.121  | ns   | >0.9999 |
| pH 2.0:ZnGly 20 vs. pH 2.0:ZnGly 150  | -3.900 | -13.15 to 5.354  | ns   | 0.9682  |
| pH 2.0:ZnGly 20 vs. pH 4.8:ZnSO4 20   | -5.675 | -17.01 to 5.659  | ns   | 0.8826  |
| pH 2.0:ZnGly 20 vs. pH 4.8:ZnSO4 100  | -5.942 | -17.28 to 5.393  | ns   | 0.8430  |
| pH 2.0:ZnGly 20 vs. pH 4.8:ZnSO4 150  | -6.142 | -17.48 to 5.193  | ns   | 0.8093  |
| pH 2.0:ZnGly 20 vs. pH 4.8:ZnGly 20   | 2.358  | -4.186 to 8.902  | ns   | 0.9927  |
| pH 2.0:ZnGly 20 vs. pH 4.8:ZnGly 100  | 0.2250 | -11.11 to 11.56  | ns   | >0.9999 |
| pH 2.0:ZnGly 20 vs. pH 4.8:ZnGly 150  | -1.542 | -12.88 to 9.793  | ns   | >0.9999 |
| pH 2.0:ZnGly 20 vs. pH 6.8:ZnSO4 20   | 5.200  | -6.134 to 16.53  | ns   | 0.9369  |
| pH 2.0:ZnGly 20 vs. pH 6.8:ZnSO4 100  | 4.933  | -6.401 to 16.27  | ns   | 0.9584  |
| pH 2.0:ZnGly 20 vs. pH 6.8:ZnSO4 150  | 4.733  | -6.601 to 16.07  | ns   | 0.9706  |
| pH 2.0:ZnGly 20 vs. pH 6.8:ZnGly 20   | 13.23  | 6.689 to 19.78   | **** | <0.0001 |
| pH 2.0:ZnGly 20 vs. pH 6.8:ZnGly 100  | 11.10  | -0.2343 to 22.43 | ns   | 0.0597  |
| pH 2.0:ZnGly 20 vs. pH 6.8:ZnGly 150  | 9.333  | -2.001 to 20.67  | ns   | 0.2022  |
| pH 2.0:ZnGly 100 vs. pH 2.0:ZnGly 150 | -1.767 | -11.02 to 7.488  | ns   | >0.9999 |
| pH 2.0:ZnGly 100 vs. pH 4.8:ZnSO4 20  | -3.542 | -14.88 to 7.793  | ns   | 0.9984  |
| pH 2.0:ZnGly 100 vs. pH 4.8:ZnSO4 100 | -3.808 | -15.14 to 7.526  | ns   | 0.9965  |
| pH 2.0:ZnGly 100 vs. pH 4.8:ZnSO4 150 | -4.008 | -15.34 to 7.326  | ns   | 0.9940  |
| pH 2.0:ZnGly 100 vs. pH 4.8:ZnGly 20  | 4.492  | -6.843 to 15.83  | ns   | 0.9816  |
| pH 2.0:ZnGly 100 vs. pH 4.8:ZnGly 100 | 2.358  | -4.186 to 8.902  | ns   | 0.9927  |
| pH 2.0:ZnGly 100 vs. pH 4.8:ZnGly 150 | 0.5917 | -10.74 to 11.93  | ns   | >0.9999 |
| pH 2.0:ZnGly 100 vs. pH 6.8:ZnSO4 20  | 7.333  | -4.001 to 18.67  | ns   | 0.5636  |

|                                       |         |                   |      |         |
|---------------------------------------|---------|-------------------|------|---------|
| pH 2.0:ZnGly 100 vs. pH 6.8:ZnSO4 100 | 7.067   | -4.268 to 18.40   | ns   | 0.6220  |
| pH 2.0:ZnGly 100 vs. pH 6.8:ZnSO4 150 | 6.867   | -4.468 to 18.20   | ns   | 0.6654  |
| pH 2.0:ZnGly 100 vs. pH 6.8:ZnGly 20  | 15.37   | 4.032 to 26.70    | **   | 0.0018  |
| pH 2.0:ZnGly 100 vs. pH 6.8:ZnGly 100 | 13.23   | 6.689 to 19.78    | **** | <0.0001 |
| pH 2.0:ZnGly 100 vs. pH 6.8:ZnGly 150 | 11.47   | 0.1324 to 22.80   | *    | 0.0452  |
| pH 2.0:ZnGly 150 vs. pH 4.8:ZnSO4 20  | -1.775  | -13.11 to 9.559   | ns   | >0.9999 |
| pH 2.0:ZnGly 150 vs. pH 4.8:ZnSO4 100 | -2.042  | -13.38 to 9.293   | ns   | >0.9999 |
| pH 2.0:ZnGly 150 vs. pH 4.8:ZnSO4 150 | -2.242  | -13.58 to 9.093   | ns   | >0.9999 |
| pH 2.0:ZnGly 150 vs. pH 4.8:ZnGly 20  | 6.258   | -5.076 to 17.59   | ns   | 0.7882  |
| pH 2.0:ZnGly 150 vs. pH 4.8:ZnGly 100 | 4.125   | -7.209 to 15.46   | ns   | 0.9919  |
| pH 2.0:ZnGly 150 vs. pH 4.8:ZnGly 150 | 2.358   | -4.186 to 8.902   | ns   | 0.9927  |
| pH 2.0:ZnGly 150 vs. pH 6.8:ZnSO4 20  | 9.100   | -2.234 to 20.43   | ns   | 0.2332  |
| pH 2.0:ZnGly 150 vs. pH 6.8:ZnSO4 100 | 8.833   | -2.501 to 20.17   | ns   | 0.2726  |
| pH 2.0:ZnGly 150 vs. pH 6.8:ZnSO4 150 | 8.633   | -2.701 to 19.97   | ns   | 0.3049  |
| pH 2.0:ZnGly 150 vs. pH 6.8:ZnGly 20  | 17.13   | 5.799 to 28.47    | ***  | 0.0004  |
| pH 2.0:ZnGly 150 vs. pH 6.8:ZnGly 100 | 15.00   | 3.666 to 26.33    | **   | 0.0024  |
| pH 2.0:ZnGly 150 vs. pH 6.8:ZnGly 150 | 13.23   | 6.689 to 19.78    | **** | <0.0001 |
| pH 4.8:ZnSO4 20 vs. pH 4.8:ZnSO4 100  | -0.2667 | -9.521 to 8.988   | ns   | >0.9999 |
| pH 4.8:ZnSO4 20 vs. pH 4.8:ZnSO4 150  | -0.4667 | -9.721 to 8.788   | ns   | >0.9999 |
| pH 4.8:ZnSO4 20 vs. pH 4.8:ZnGly 20   | 8.033   | -1.221 to 17.29   | ns   | 0.1461  |
| pH 4.8:ZnSO4 20 vs. pH 4.8:ZnGly 100  | 5.900   | -3.354 to 15.15   | ns   | 0.5871  |
| pH 4.8:ZnSO4 20 vs. pH 4.8:ZnGly 150  | 4.133   | -5.121 to 13.39   | ns   | 0.9488  |
| pH 4.8:ZnSO4 20 vs. pH 6.8:ZnSO4 20   | 10.88   | 4.331 to 17.42    | **** | <0.0001 |
| pH 4.8:ZnSO4 20 vs. pH 6.8:ZnSO4 100  | 10.61   | -0.7259 to 21.94  | ns   | 0.0857  |
| pH 4.8:ZnSO4 20 vs. pH 6.8:ZnSO4 150  | 10.41   | -0.9259 to 21.74  | ns   | 0.0988  |
| pH 4.8:ZnSO4 20 vs. pH 6.8:ZnGly 20   | 18.91   | 7.574 to 30.24    | **** | <0.0001 |
| pH 4.8:ZnSO4 20 vs. pH 6.8:ZnGly 100  | 16.78   | 5.441 to 28.11    | ***  | 0.0005  |
| pH 4.8:ZnSO4 20 vs. pH 6.8:ZnGly 150  | 15.01   | 3.674 to 26.34    | **   | 0.0024  |
| pH 4.8:ZnSO4 100 vs. pH 4.8:ZnSO4 150 | -0.2000 | -9.454 to 9.054   | ns   | >0.9999 |
| pH 4.8:ZnSO4 100 vs. pH 4.8:ZnGly 20  | 8.300   | -0.9544 to 17.55  | ns   | 0.1171  |
| pH 4.8:ZnSO4 100 vs. pH 4.8:ZnGly 100 | 6.167   | -3.088 to 15.42   | ns   | 0.5159  |
| pH 4.8:ZnSO4 100 vs. pH 4.8:ZnGly 150 | 4.400   | -4.854 to 13.65   | ns   | 0.9178  |
| pH 4.8:ZnSO4 100 vs. pH 6.8:ZnSO4 20  | 11.14   | -0.1926 to 22.48  | ns   | 0.0579  |
| pH 4.8:ZnSO4 100 vs. pH 6.8:ZnSO4 100 | 10.88   | 4.331 to 17.42    | **** | <0.0001 |
| pH 4.8:ZnSO4 100 vs. pH 6.8:ZnSO4 150 | 10.68   | -0.6593 to 22.01  | ns   | 0.0817  |
| pH 4.8:ZnSO4 100 vs. pH 6.8:ZnGly 20  | 19.18   | 7.841 to 30.51    | **** | <0.0001 |
| pH 4.8:ZnSO4 100 vs. pH 6.8:ZnGly 100 | 17.04   | 5.707 to 28.38    | ***  | 0.0004  |
| pH 4.8:ZnSO4 100 vs. pH 6.8:ZnGly 150 | 15.28   | 3.941 to 26.61    | **   | 0.0019  |
| pH 4.8:ZnSO4 150 vs. pH 4.8:ZnGly 20  | 8.500   | -0.7544 to 17.75  | ns   | 0.0987  |
| pH 4.8:ZnSO4 150 vs. pH 4.8:ZnGly 100 | 6.367   | -2.888 to 15.62   | ns   | 0.4638  |
| pH 4.8:ZnSO4 150 vs. pH 4.8:ZnGly 150 | 4.600   | -4.654 to 13.85   | ns   | 0.8881  |
| pH 4.8:ZnSO4 150 vs. pH 6.8:ZnSO4 20  | 11.34   | 0.007412 to 22.68 | *    | 0.0497  |
| pH 4.8:ZnSO4 150 vs. pH 6.8:ZnSO4 100 | 11.08   | -0.2593 to 22.41  | ns   | 0.0608  |
| pH 4.8:ZnSO4 150 vs. pH 6.8:ZnSO4 150 | 10.88   | 4.331 to 17.42    | **** | <0.0001 |
| pH 4.8:ZnSO4 150 vs. pH 6.8:ZnGly 20  | 19.38   | 8.041 to 30.71    | **** | <0.0001 |
| pH 4.8:ZnSO4 150 vs. pH 6.8:ZnGly 100 | 17.24   | 5.907 to 28.58    | ***  | 0.0003  |
| pH 4.8:ZnSO4 150 vs. pH 6.8:ZnGly 150 | 15.48   | 4.141 to 26.81    | **   | 0.0016  |
| pH 4.8:ZnGly 20 vs. pH 4.8:ZnGly 100  | -2.133  | -11.39 to 7.121   | ns   | >0.9999 |
| pH 4.8:ZnGly 20 vs. pH 4.8:ZnGly 150  | -3.900  | -13.15 to 5.354   | ns   | 0.9682  |

|                                       |         |                  |      |         |
|---------------------------------------|---------|------------------|------|---------|
| pH 4.8:ZnGly 20 vs. pH 6.8:ZnSO4 20   | 2.842   | -8.493 to 14.18  | ns   | 0.9999  |
| pH 4.8:ZnGly 20 vs. pH 6.8:ZnSO4 100  | 2.575   | -8.759 to 13.91  | ns   | >0.9999 |
| pH 4.8:ZnGly 20 vs. pH 6.8:ZnSO4 150  | 2.375   | -8.959 to 13.71  | ns   | >0.9999 |
| pH 4.8:ZnGly 20 vs. pH 6.8:ZnGly 20   | 10.88   | 4.331 to 17.42   | **** | <0.0001 |
| pH 4.8:ZnGly 20 vs. pH 6.8:ZnGly 100  | 8.742   | -2.593 to 20.08  | ns   | 0.2871  |
| pH 4.8:ZnGly 20 vs. pH 6.8:ZnGly 150  | 6.975   | -4.359 to 18.31  | ns   | 0.6420  |
| pH 4.8:ZnGly 100 vs. pH 4.8:ZnGly 150 | -1.767  | -11.02 to 7.488  | ns   | >0.9999 |
| pH 4.8:ZnGly 100 vs. pH 6.8:ZnSO4 20  | 4.975   | -6.359 to 16.31  | ns   | 0.9554  |
| pH 4.8:ZnGly 100 vs. pH 6.8:ZnSO4 100 | 4.708   | -6.626 to 16.04  | ns   | 0.9719  |
| pH 4.8:ZnGly 100 vs. pH 6.8:ZnSO4 150 | 4.508   | -6.826 to 15.84  | ns   | 0.9810  |
| pH 4.8:ZnGly 100 vs. pH 6.8:ZnGly 20  | 13.01   | 1.674 to 24.34   | *    | 0.0131  |
| pH 4.8:ZnGly 100 vs. pH 6.8:ZnGly 100 | 10.88   | 4.331 to 17.42   | **** | <0.0001 |
| pH 4.8:ZnGly 100 vs. pH 6.8:ZnGly 150 | 9.108   | -2.226 to 20.44  | ns   | 0.2320  |
| pH 4.8:ZnGly 150 vs. pH 6.8:ZnSO4 20  | 6.742   | -4.593 to 18.08  | ns   | 0.6919  |
| pH 4.8:ZnGly 150 vs. pH 6.8:ZnSO4 100 | 6.475   | -4.859 to 17.81  | ns   | 0.7466  |
| pH 4.8:ZnGly 150 vs. pH 6.8:ZnSO4 150 | 6.275   | -5.059 to 17.61  | ns   | 0.7851  |
| pH 4.8:ZnGly 150 vs. pH 6.8:ZnGly 20  | 14.78   | 3.441 to 26.11   | **   | 0.0029  |
| pH 4.8:ZnGly 150 vs. pH 6.8:ZnGly 100 | 12.64   | 1.307 to 23.98   | *    | 0.0178  |
| pH 4.8:ZnGly 150 vs. pH 6.8:ZnGly 150 | 10.88   | 4.331 to 17.42   | **** | <0.0001 |
| pH 6.8:ZnSO4 20 vs. pH 6.8:ZnSO4 100  | -0.2667 | -9.521 to 8.988  | ns   | >0.9999 |
| pH 6.8:ZnSO4 20 vs. pH 6.8:ZnSO4 150  | -0.4667 | -9.721 to 8.788  | ns   | >0.9999 |
| pH 6.8:ZnSO4 20 vs. pH 6.8:ZnGly 20   | 8.033   | -1.221 to 17.29  | ns   | 0.1461  |
| pH 6.8:ZnSO4 20 vs. pH 6.8:ZnGly 100  | 5.900   | -3.354 to 15.15  | ns   | 0.5871  |
| pH 6.8:ZnSO4 20 vs. pH 6.8:ZnGly 150  | 4.133   | -5.121 to 13.39  | ns   | 0.9488  |
| pH 6.8:ZnSO4 100 vs. pH 6.8:ZnSO4 150 | -0.2000 | -9.454 to 9.054  | ns   | >0.9999 |
| pH 6.8:ZnSO4 100 vs. pH 6.8:ZnGly 20  | 8.300   | -0.9544 to 17.55 | ns   | 0.1171  |
| pH 6.8:ZnSO4 100 vs. pH 6.8:ZnGly 100 | 6.167   | -3.088 to 15.42  | ns   | 0.5159  |
| pH 6.8:ZnSO4 100 vs. pH 6.8:ZnGly 150 | 4.400   | -4.854 to 13.65  | ns   | 0.9178  |
| pH 6.8:ZnSO4 150 vs. pH 6.8:ZnGly 20  | 8.500   | -0.7544 to 17.75 | ns   | 0.0987  |
| pH 6.8:ZnSO4 150 vs. pH 6.8:ZnGly 100 | 6.367   | -2.888 to 15.62  | ns   | 0.4638  |
| pH 6.8:ZnSO4 150 vs. pH 6.8:ZnGly 150 | 4.600   | -4.654 to 13.85  | ns   | 0.8881  |
| pH 6.8:ZnGly 20 vs. pH 6.8:ZnGly 100  | -2.133  | -11.39 to 7.121  | ns   | >0.9999 |
| pH 6.8:ZnGly 20 vs. pH 6.8:ZnGly 150  | -3.900  | -13.15 to 5.354  | ns   | 0.9682  |
| pH 6.8:ZnGly 100 vs. pH 6.8:ZnGly 150 | -1.767  | -11.02 to 7.488  | ns   | >0.9999 |

Asterisks represent p- value classification (\*  $p < 0.05$ , \*\*  $p < 0.01$ , \*\*\*  $p < 0.001$  \*\*\*\*  $p < 0.0001$ ).
